# Supplementary material for: Computerized Conjoint Analysis of the Weight Treatment Preferences of Individuals With Schizophrenia
Source: Atypon-hosted journal article supplement (doi:10.1176/appi.ps.202000068), 2021-01-12
Supplement: appi.ps.202000068.ds001.pdf [file appi.ps.202000068.ds001.pdf]

Sample conjoint analysis system choice task

Which of these two choices of weight services do you prefer?

|                                                                                                                                                 |           |                                                                                                                                                                  |
|-------------------------------------------------------------------------------------------------------------------------------------------------|-----------|------------------------------------------------------------------------------------------------------------------------------------------------------------------|
| <p>A program at a mental health clinic with other clients</p>  | <p>OR</p> | <p>A program at a community location with individuals from the community</p>  |
| AND                                                                                                                                             |           | AND                                                                                                                                                              |
| <p>A leader with knowledge of mental illness and weight</p>    |           | <p>A leader with knowledge of weight loss</p>                                 |
| AND                                                                                                                                             |           | AND                                                                                                                                                              |
| <p>A program that does not use the internet</p>                |           | <p>A program that includes the internet</p>                                   |
| <p>I PREFER THIS ONE</p>                                                                                                                        |           | <p>I PREFER THIS ONE</p>                                                                                                                                         |
